# Supplementary material for: Precise synthesis of amphiphilic diblock copolymers consisting of various ionic liquid-type segments and their influence on physical gelation behavior in water
Source: Royal Society of Chemistry journal article supplement (doi:10.1039/d0ra09163d), 2020-01-01
Supplement: d0ra09163d1.pdf [file d0ra09163d1.pdf]

## Electronic Supplementary Information for

### Precise synthesis of amphiphilic diblock copolymers consisting of various ionic liquid-type segments and their influence on physical gelation behavior in water

Daichi Yokota, Arihiro Kanazawa, and Sadahito Aoshima\*

*Department of Macromolecular Science, Graduate School of Science, Osaka University, Toyonaka, Osaka 560-0043, Japan*

#### Contents:

**Figure S1.**  $^1\text{H}$  NMR spectrum of  $\text{ODVE}_n\text{-}b\text{-CEVE}_m$ .

**Figure S2.** Synthesis of  $\text{ODVE}_{50}\text{-}co\text{-CEVE}_{400}$  by living cationic copolymerization.

**Figure S3.**  $^1\text{H}$  NMR spectra of  $\text{PhOVE}_{50}$  and  $\text{PhOVE}_{50}\text{-}b\text{-CEVE}_{400}$ .

**Figure S4.**  $^1\text{H}$  NMR spectra of  $\text{IBVE}_{50}\text{-}b\text{-CEVE}_{400}$ ,  $\text{IBVE}_{50}\text{-}b\text{-}[\text{MeIm}][\text{BF}_4]_{400}$ ,  $\text{IBVE}_{50}\text{-}b\text{-}[\text{EtIm}][\text{BF}_4]_{400}$ , and  $\text{IBVE}_{50}\text{-}b\text{-}[\text{BuIm}][\text{BF}_4]_{400}$ .

**Table S1.** Critical gelation concentration and physical gelation temperature of  $\text{IBVE}_n\text{-}b\text{-}[\text{Me}_2\text{Im}][\text{BF}_4]_{400}$  in 1 wt% aqueous solution.

**Figure S5.** Photograph of physical gelation behavior of  $\text{ODVE}_{10}\text{-}b\text{-}[\text{Me}_2\text{Im}][\text{BF}_4]_{400}$  in 0.6 wt% aqueous solution.

**Figure S6.** Frequency dependence of dynamic moduli, storage modulus  $G'$  and loss modulus  $G''$  of  $\text{PhOVE}_n\text{-}b\text{-}[\text{Me}_2\text{Im}][\text{BF}_4]_{400}$  ( $n = 50$  and  $100$ ) in 10 wt% aqueous solutions at  $55\text{ }^\circ\text{C}$ .

**Table S2.** Status of aqueous solutions of various amphiphilic block copolymers at different concentrations.

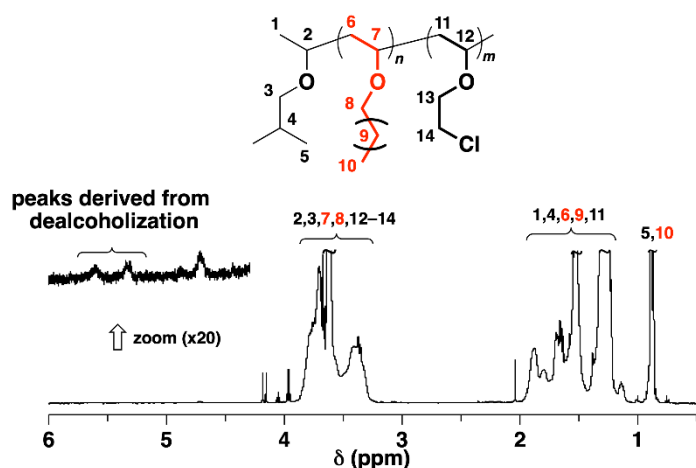

**Figure S1.**  $^1\text{H}$  NMR spectrum of  $\text{ODVE}_n\text{-}b\text{-CEVE}_m$ :  $[\text{ODVE}]_0 = 0.20$  M,  $[\text{CEVE}]_{\text{add}} = 1.6$  M,  $[\text{IBEA}]_0 = 4.0$  mM,  $[\text{Et}_{1.5}\text{AlCl}_{1.5}]_0 = 20$  mM,  $[\text{ethyl acetate}] = 1.0$  M in toluene at  $20^\circ\text{C}$ . (in  $\text{CDCl}_3$  at  $30^\circ\text{C}$ )

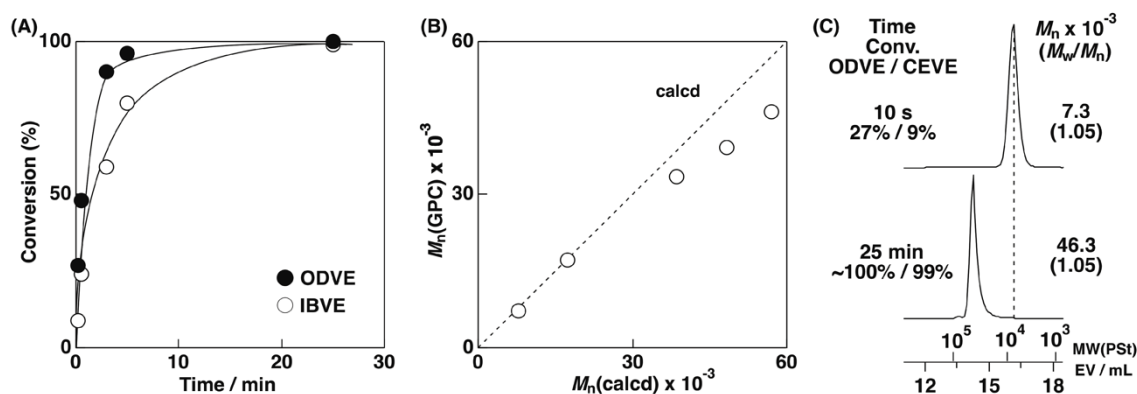

**Figure S2.** Synthesis of  $\text{ODVE}_{50}\text{-}co\text{-CEVE}_{400}$  by living cationic copolymerization (entry 23, Table 1). (A) Time-conversion plots of the copolymerization, (B) the  $M_n$  values, and (C) MWD curves of the products obtained:  $[\text{ODVE}]_0 = 0.20$  M,  $[\text{CEVE}]_0 = 1.6$  M,  $[\text{IBEA}]_0 = 4.0$  mM,  $[\text{Et}_{1.5}\text{AlCl}_{1.5}]_0 = 5.0$  mM,  $[\text{SnCl}_4]_0 = 10$  mM,  $[\text{DTBP}]_0 = 10$  mM,  $[\text{1,4-dioxane}] = 1.2$  M in toluene at  $20^\circ\text{C}$ .

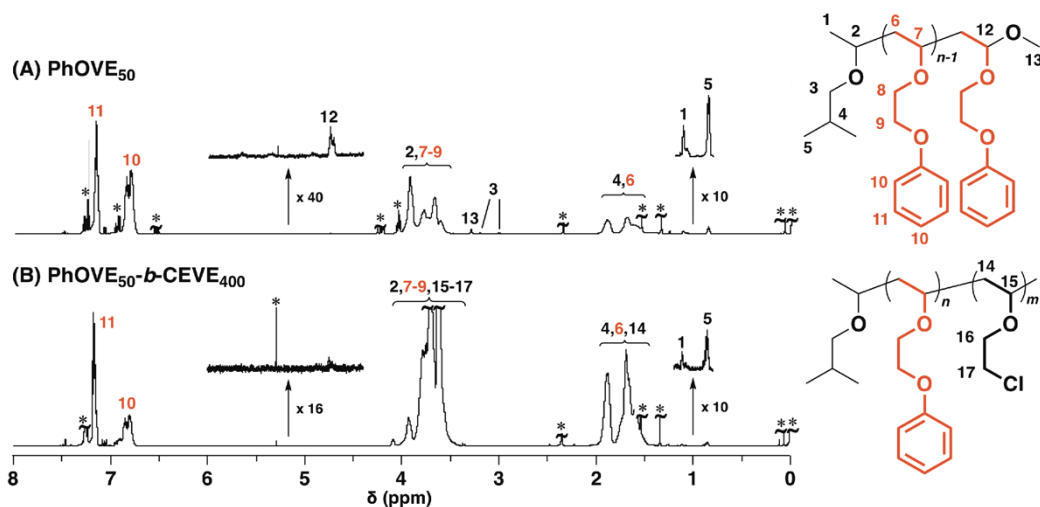

**Figure S3.**  $^1\text{H}$  NMR spectra of (A) PhOVE<sub>50</sub> (the upper curve in Figure 4B) and (B) PhOVE<sub>50</sub>-*b*-CEVE<sub>400</sub> (entry 25, Table 1; the lower curve in Figure 4B) (in CDCl<sub>3</sub> at 30 °C; \* monomer, solvent, toluene, water, grease, TMS).

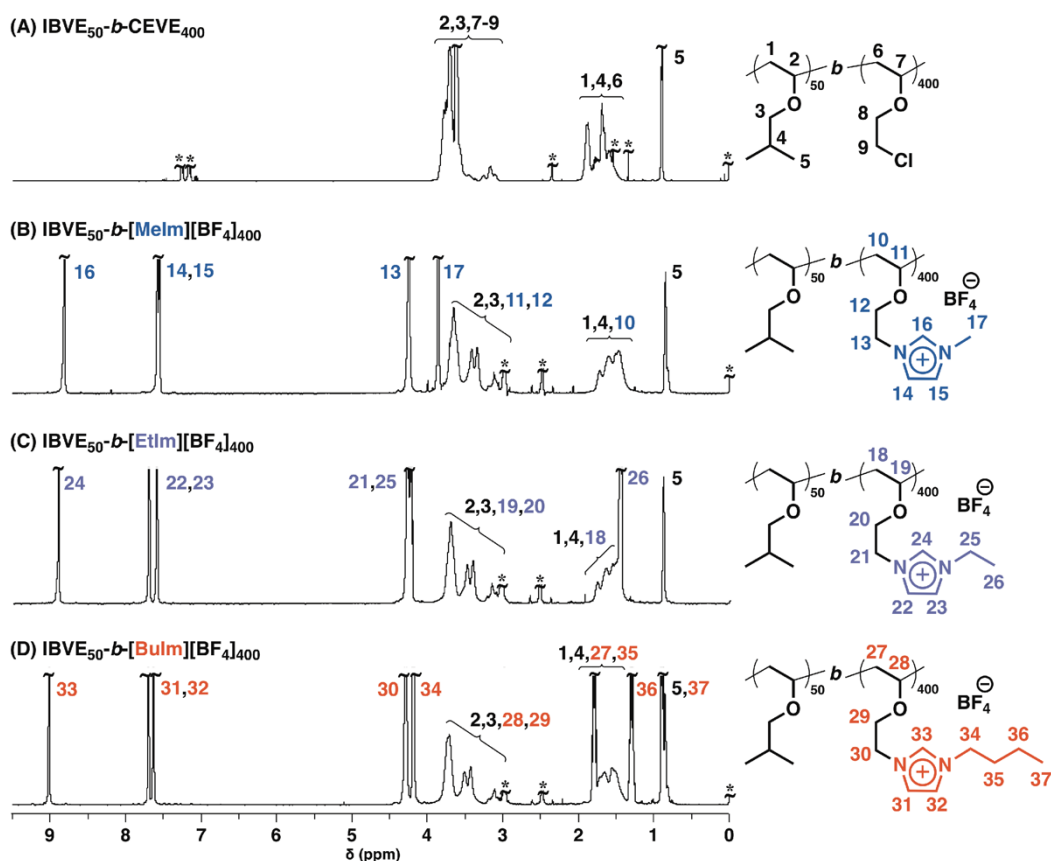

**Figure S4.**  $^1\text{H}$  NMR spectra of (A) IBVE<sub>50</sub>-*b*-CEVE<sub>400</sub> in CDCl<sub>3</sub> at 30 °C, (B) IBVE<sub>50</sub>-*b*-[MeIm][BF<sub>4</sub>]<sub>400</sub>, (C) IBVE<sub>50</sub>-*b*-[EtIm][BF<sub>4</sub>]<sub>400</sub>, and (D) IBVE<sub>50</sub>-*b*-[BuIm][BF<sub>4</sub>]<sub>400</sub> in DMSO-*d*<sub>6</sub> at 100 °C; \*solvent, toluene, H<sub>2</sub>O.

**Table S1.** Critical gelation concentration and physical gelation temperature of IBVE<sub>*n*</sub>-*b*-[Me<sub>2</sub>Im][BF<sub>4</sub>]<sub>400</sub> in 1 wt% aqueous solution.

| Entry | IBVE <sub><i>n</i></sub> - <i>b</i> -<br>[Me <sub>2</sub> Im][BF <sub>4</sub> ] <sub>400</sub><br><i>n</i> = | Critical<br>Gelation<br>Concentration <sup><i>b</i></sup> |
|-------|--------------------------------------------------------------------------------------------------------------|-----------------------------------------------------------|
| 1     | 10                                                                                                           | 3 wt%                                                     |
| 2     | 20                                                                                                           | 0.4 wt%                                                   |
| 3     | 30                                                                                                           | 0.6 wt%                                                   |
| 4     | 40                                                                                                           | 0.6 wt%                                                   |
| 5     | 50                                                                                                           | 0.7 wt%                                                   |
| 6     | 100                                                                                                          | 1 wt%                                                     |
| 7     | 200                                                                                                          | Insoluble                                                 |

<sup>*a*</sup> Determined by <sup>1</sup>H NMR spectra of copolymers before and after chemical modifications. <sup>*b*</sup> Status of solution at 60 °C.

**ODVE<sub>10</sub>-*b*-[Me<sub>2</sub>Im][BF<sub>4</sub>]<sub>400</sub>  
in 0.6 wt%**

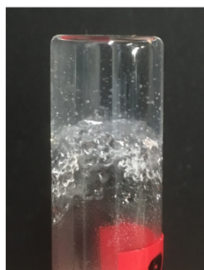

**Figure S5.** Photograph of physical gelation behavior of ODVE<sub>10</sub>-*b*-[Me<sub>2</sub>Im][BF<sub>4</sub>]<sub>400</sub> in 0.6 wt% aqueous solution

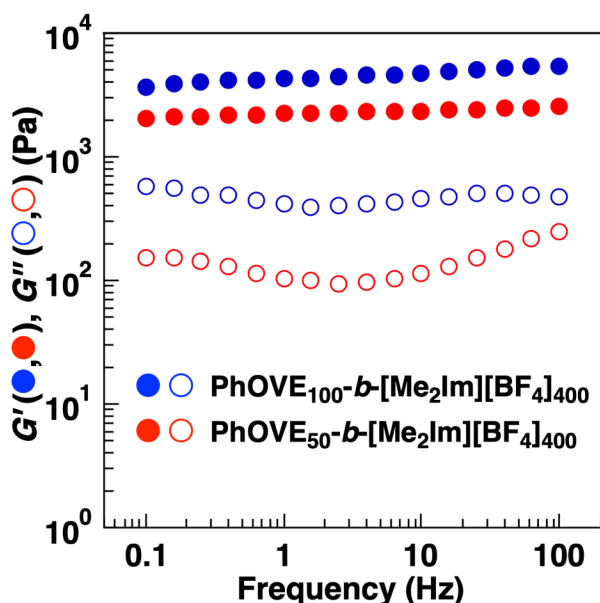

**Figure S6.** Frequency dependence of dynamic moduli, storage modulus  $G'$  (filled symbols) and loss modulus  $G''$  (open symbols) of  $\text{PhOVE}_n\text{-}b\text{-}[\text{Me}_2\text{Im}][\text{BF}_4]_{400}$  ( $n = 50$  and  $100$ ) in 10 wt% aqueous solutions at 55 °C.

**Table S2.** Status of aqueous solutions of various amphiphilic block copolymers at different concentrations.

| Entry | Hydrophobic | Unit | Cation                 | Anion         | Unit | Conc. (wt%) |     |     |     |
|-------|-------------|------|------------------------|---------------|------|-------------|-----|-----|-----|
|       |             |      |                        |               |      | 1           | 0.4 | 0.2 | 0.1 |
| 1     | PhOVE       | 50   | $\text{Me}_2\text{Im}$ | $\text{BF}_4$ | 400  | Gel         | Sol | Sol | Sol |
| 2     | IBVE        | 20   | $\text{MeIm}$          | $\text{Cl}$   | 800  | Gel         | Sol | –   | –   |
| 3     | ODVE        | 10   | $\text{Me}_2\text{Im}$ | $\text{BF}_4$ | 400  | Gel         | Sol | –   | –   |
| 4     | ODVE        | 10   | $\text{MeIm}$          | $\text{BF}_4$ | 800  | Gel         | Sol | –   | –   |
| 5     | ODVE        | 10   | $\text{MeIm}$          | $\text{Cl}$   | 800  | Gel         | Gel | Gel | Sol |
| 6     | ODVE        | 10   | $\text{MeIm}$          | $\text{BF}_4$ | 1200 | Gel         | Sol | –   | –   |
| 7     | ODVE        | 10   | $\text{MeIm}$          | $\text{Cl}$   | 1200 | Gel         | Sol | –   | –   |
| 8     | ODVE        | 20   | $\text{Me}_2\text{Im}$ | $\text{BF}_4$ | 400  | Sol         | –   | –   | –   |
| 9     | ODVE        | 20   | $\text{Me}_2\text{Im}$ | $\text{BF}_4$ | 800  | Gel         | Sol | –   | –   |
| 10    | ODVE        | 20   | $\text{Me}_2\text{Im}$ | $\text{Cl}$   | 800  | Gel         | Gel | Sol | –   |
| 11    | ODVE        | 20   | $\text{MeIm}$          | $\text{BF}_4$ | 800  | Sol         | –   | –   | –   |
| 12    | ODVE        | 20   | $\text{MeIm}$          | $\text{Cl}$   | 800  | Gel         | Sol | –   | –   |
| 13    | ODVE        | 20   | $\text{MeIm}$          | $\text{BF}_4$ | 1200 | Sol         | –   | –   | –   |
| 14    | ODVE        | 20   | $\text{MeIm}$          | $\text{Cl}$   | 1200 | Gel         | Sol | –   | –   |

<sup>a</sup> Determined using the test-tube inversion method (gel: retention, sol: flow) at 50 °C.
